# 1 Classification of multigene families of African swine fever viruses

2 Zhaozhong Zhu<sup>1, #</sup>, Huiting Chen<sup>1, #</sup>, Yang Cao<sup>2</sup>, Taijiao Jiang<sup>3</sup>, Yuanqiang Zou<sup>4, \*</sup>, Yousong  
3 Peng<sup>1, \*</sup>  
4

5 <sup>1</sup> College of Biology, Hunan University, Changsha, China

6 <sup>2</sup> Center of Growth, Metabolism and Aging, Key Laboratory of Bio-Resource and  
7 Eco-Environment of Ministry of Education, College of Life Sciences, Sichuan University,  
8 Chengdu 610065, Sichuan, China

9 <sup>3</sup>Center for Systems Medicine, Institute of Basic Medical Sciences, Chinese Academy of  
10 Medical Sciences & Peking Union Medical College, Beijing 100005; Suzhou Institute of  
11 Systems Medicine, Suzhou, Jiangsu 215123, China

12 <sup>4</sup>Changsha Qiangze Biotech Co., Ltd, Changsha, China

13 # These authors contributed equally to this work

14 \* To whom correspondence should be addressed. Email: [pys2013@hnu.edu.cn](mailto:pys2013@hnu.edu.cn)  
15

## 16 **Abstract**

17 African swine fever virus (ASFV) is a large and complex double-stranded DNA virus  
18 that poses serious threats to the pig industry. It is well-accepted that the multigene  
19 family (MGF) proteins are extensively distributed in ASFVs and are generally  
20 classified into five families, including MGF-100, MGF-110, MGF-300, MGF-360 and  
21 MGF-505. Most MGF proteins, however, have not been well characterized and  
22 classified within each family. To bridge this gap, this study first classified the MGF  
23 proteins into 35 groups based on protein sequence homology. A web server for  
24 classifying the MGF proteins was then established and available for free at  
25 <http://www.computationalbiology.cn/MGF/home.html>. Results showed that the  
26 genetic diversity of the MGF groups varied widely, mainly due to the occurrence of  
27 indels. In addition, the MGF proteins were predicted to have large structural and  
28 functional diversity, and the MGF proteins of the same MGF family tended to have

29 similar structure, location and function. Evolutionary analysis revealed the dynamic  
30 changes of the MGF proteins in the ASFV genomes, and more than half of MGF  
31 groups were presented in all ASFV genomes, which indicated the important role of  
32 MGF proteins in ASFVs. Overall, it is expected that the work would not only provide  
33 a detailed classification for MGF proteins, but also facilitate further research on MGF  
34 proteins.

## 35 **1 Introduction**

36 African swine fever (ASF) is a viral disease in swine that leads to a high mortality in  
37 domestic pigs (Parker, Plowright, & Pierce, 1969). The disease has been endemic in  
38 sub-Saharan Africa for many years and has spread to many countries in Eastern  
39 Europe and Russia in the past decades (Costard, Mur, Lubroth, Sanchez-Vizcaino, &  
40 Pfeiffer, 2013; Galindo & Alonso). In the past two years, ASF has spread to China and  
41 caused epidemics in almost all provinces of the country (Ge et al.; Li et al., 2019).  
42 Despite the growing threat to the world's pig industry, effective vaccine and drugs  
43 have not yet been developed (Teklue, Sun, Muhammad, Luo, & Qiu, 2019).

44 African swine fever virus (ASFV), the pathogen of ASF, is a large double-stranded  
45 DNA virus with a genome size of 170 kb to 190kb and is the only member of the  
46 Asfarviridae family (Arias, Jurado, Gallardo, Fernández - Pinero, &  
47 Sánchez - Vizcaíno, 2018; L. K. Dixon, Chapman, Netherton, & Upton, 2013). ASFV  
48 encodes more than 150 proteins, including proteins related to viral transcription and  
49 replication, structural proteins, viral enzymes, etc (L. K. Dixon et al., 2013).  
50 Unfortunately, over half of these proteins have not been well characterized, especially  
51 for the multigene family (MGF) proteins (Keßler et al., 2018). In general, the MGF  
52 proteins are mainly encoded at both ends of the genome and are the most abundant  
53 proteins in ASFVs (Vydelingum, Baylis, Bristow, Smith, & Dixon, 1993; Yozawa,  
54 Kutish, Afonso, Lu, & Rock, 1994). Depending on the size of the MGF proteins, they  
55 can be divided into five families, including MGF-100, MGF-110, MGF-300,  
56 MGF-360 and MGF-505 (Chapman, Tcherepanov, Upton, & Dixon, 2008; Keßler et

57 al., 2018). Previous studies have shown that MGF proteins play important roles in  
58 host viral infection, including the transcription and translation, virulence, immune  
59 escape, etc. For example, MGF-360 and MGF-505 genes have been shown to  
60 attenuate a highly virulent ASFV isolate (Neilan et al., 2002; Zsak et al., 2001).  
61 However, most MGF proteins have not been structurally and functionally  
62 characterized. Considering the great diversity of MGF proteins in each MGF family,  
63 there is also a lack of further classification of the MGF proteins.

64 To bridge this gap, this study first classified the MGF proteins based on protein  
65 sequence homology. After that, the genetic diversity, structure, function and evolution  
66 of MGF proteins were thoroughly investigated. We hypothesized that a more detailed  
67 classification for MGF proteins could be obtained to facilitate further research on  
68 MGF proteins.

69

## 70 **2 Materials and Methods**

### 71 **2.1 MGF grouping**

72 A total of 1552 MGF proteins encoded in 39 ASFV genomes were adapted from  
73 Zhu's study (Zhu et al., 2019). The MGF proteins were then grouped based on  
74 sequence homology and network clustering using OrthoFinder (version 2.2.7) (Emms  
75 & Kelly, 2015) with default parameters, resulting in a total of 35 protein groups. The  
76 protein sequences of each MGF group were further aligned by MAFFT (version 7)  
77 (Kato & Standley, 2013) with default parameters.

### 78 **2.2 Phylogenetic tree inference and visualization**

79 To build the phylogenetic tree of each MGF family, the protein sequences of each  
80 MGF group were aligned by MAFFT (version 7) with default parameters. The MEGA  
81 (version X) (Kumar, Stecher, Li, Knyaz, & Tamura, 2018) with default parameters  
82 was employed to build a maximum-likelihood phylogenetic tree. Bootstrap analysis

83 was then conducted with 100 replicates. Finally, the phylogenetic tree was visualized  
84 using Dendroscope (version 2.7.4) (Huson et al., 2007).

### 85 **2.3 Structure and function analysis of MGF groups**

86 The largest MGF protein within each MGF group was selected as queries to predict  
87 the structure and function features of MGF groups using various public tools.  
88 Specifically, the disordered regions of MGF proteins were predicted by the DISPRED  
89 (Peng, Radivojac, Vucetic, Dunker, & Obradovic, 2006) server (available at  
90 <http://www.dabi.temple.edu/disprot/predictor.php>). The secondary structures of MGF  
91 proteins were predicted by PHD (Geourjon & Deleage, 1995) (available at  
92 [https://npsa-prabi.ibcp.fr/cgi-bin/npsa\\_automat.pl?page=/NPSA/npsa\\_phd.html](https://npsa-prabi.ibcp.fr/cgi-bin/npsa_automat.pl?page=/NPSA/npsa_phd.html)).

93 Additionally, the transmembrane domain of MGF proteins were predicted using the  
94 TMHMM (Möller, Croning, & Apweiler, 2001) server (available at  
95 <http://www.cbs.dtu.dk/services/TMHMM/>), while the signal peptide and subcellular  
96 localization of MGF proteins were predicted by the SignalIP (Armenteros et al., 2019)  
97 server (available at <http://www.cbs.dtu.dk/services/SignalP/>) and Cell-PLoc 2.0 (Chou  
98 & Shen, 2010) (available at <http://www.csbio.sjtu.edu.cn/bioinf/Cell-PLoc-2/>),  
99 respectively. Finally, the post-translational modification of MGF proteins including  
100 the N-linked glycosylation, acetylation, and ubiquitination, were predicted by the  
101 NetNGlyc (Gupta, Jung, & Brunak, 2004) server (available at  
102 <http://www.cbs.dtu.dk/services/NetNGlyc/>), NetAcet (Kierner, Bendtsen, & Blom,  
103 2004) server (available at <http://www.cbs.dtu.dk/services/NetAcet/>) and iUbiq-Lys  
104 (Wang, Xiao, & Chou, 2011) server (available at  
105 <http://www.jci-bioinfo.cn/iUbiq-Lys>).

### 106 **2.4 Statistical analysis**

107 All the statistical analyses were conducted in R (version 3.2.5) (R Core Team, 2013).  
108 The wilcox rank-sum test was conducted by the function of *wilcox.test()* in R. The  
109 correlation coefficient was conducted by the function of *cor.test()* in R.

## 110 2.5 Data availability

111 All the protein sequences of MGF groups used in this study are publicly available at  
112 <http://www.computationalbiology.cn/MGF/home.html>.

113

## 114 Results

### 115 Classification of MGF proteins in ASFV

116 The number of groups in each MGF family was identified and shown in Figure 1.  
117 Specifically, a total of 3, 7, 2, 13 and 10 groups were identified in MGF families of  
118 100, 110, 300, 360 and 505, respectively. The groups were named after a combination  
119 of the name of MGF family and a letter that began with “A” and followed alphabet  
120 order as the number of proteins in the group decreased. For example, the MGF groups  
121 in the family of MGF-110 were named MGF-110-A ~ MGF-110-G. In addition, most  
122 MGF groups contained 20 to 110 proteins except MGF-505J that only contained two  
123 MGF proteins (Table S1). The average number of proteins in all MGF groups was 44.

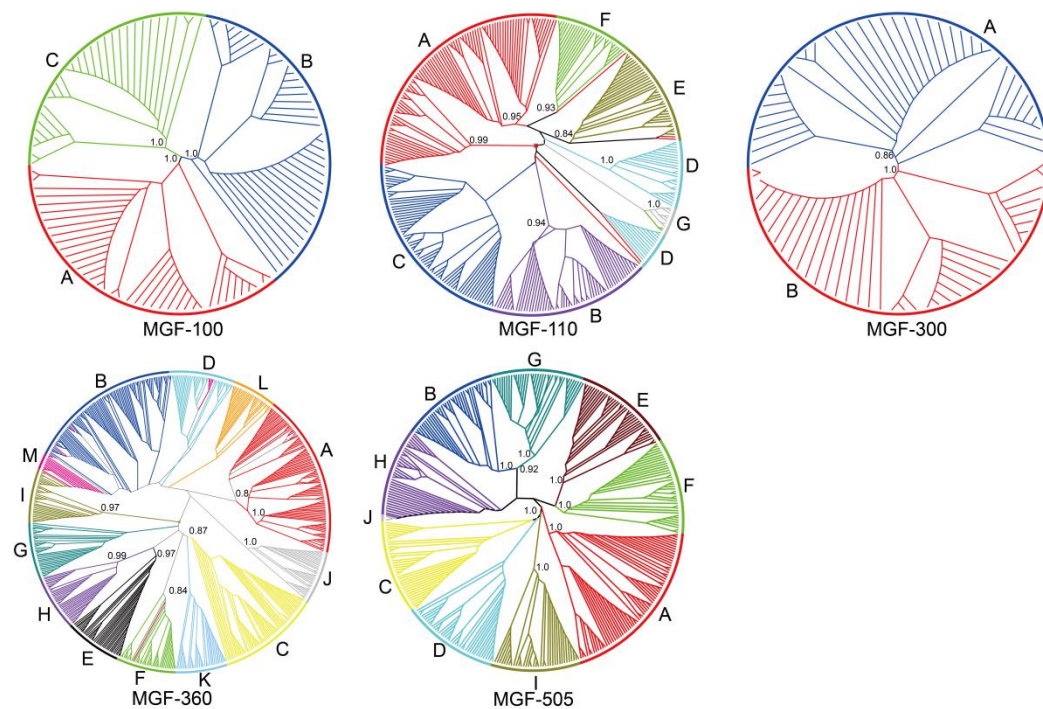

125 **Figure 1.** The maximum-likelihood phylogenetic tree for each MGF family. The  
126 MGF groups were colored in each MGF family. The letters denoted the names of the  
127 MGF groups. The numbers in the tree referred to the bootstrap value.

128 The maximum-likelihood phylogenetic trees were built for each MGF family based  
129 on MGF protein sequences (Figure 1). Results showed that for most MGF groups, the  
130 proteins from the same MGF group were clustered together in the phylogenetic trees,  
131 indicating the accuracy of the MGF grouping. A leave-one-out test was further  
132 performed to validate the MGF grouping. Specifically, each MGF protein was queried  
133 against the MGF proteins by blast. The MGF group of the best blast hit (except the  
134 query protein) was predicted as the MGF group of the query protein. The predictive  
135 accuracy was then calculated for each MGF group. 30 out of 35 groups achieved an  
136 accuracy of 100% (Table S2). The remaining MGF groups in MGF-110A, MGF-110E,  
137 MGF-360D, MGF-360M and MGF-505J achieved an accuracy of 98%, 97%, 97%,  
138 90% and 50%, respectively.

139 The 861 MGF proteins downloaded in the NCBI protein database were classified into  
140 34 MGF groups based on the MGF grouping and best blast hit method (Table S3). To  
141 facilitate the use of the MGF grouping, a web server named MGFC was established,  
142 which is available for free at <http://www.computationalbiology.cn/MGF/home.html>.

### 143 **Genetic diversity of the MGF groups**

144 The genetic diversity of the MGF groups was analyzed. The diversity index, defined  
145 as the average ratio of the protein sequence differences, was calculated for each MGF  
146 group. Briefly, the value of diversity index ranged from 0.05 to 0.40 with an average  
147 of 0.15. While the diversity indexes of some MGF groups were larger than 0.3, such  
148 as the MGF-110B and MGF-360B, the diversity indexes of most MGF groups were  
149 less than 0.15, especially for the MGF-300 and MGF-505 families (Figure 2).

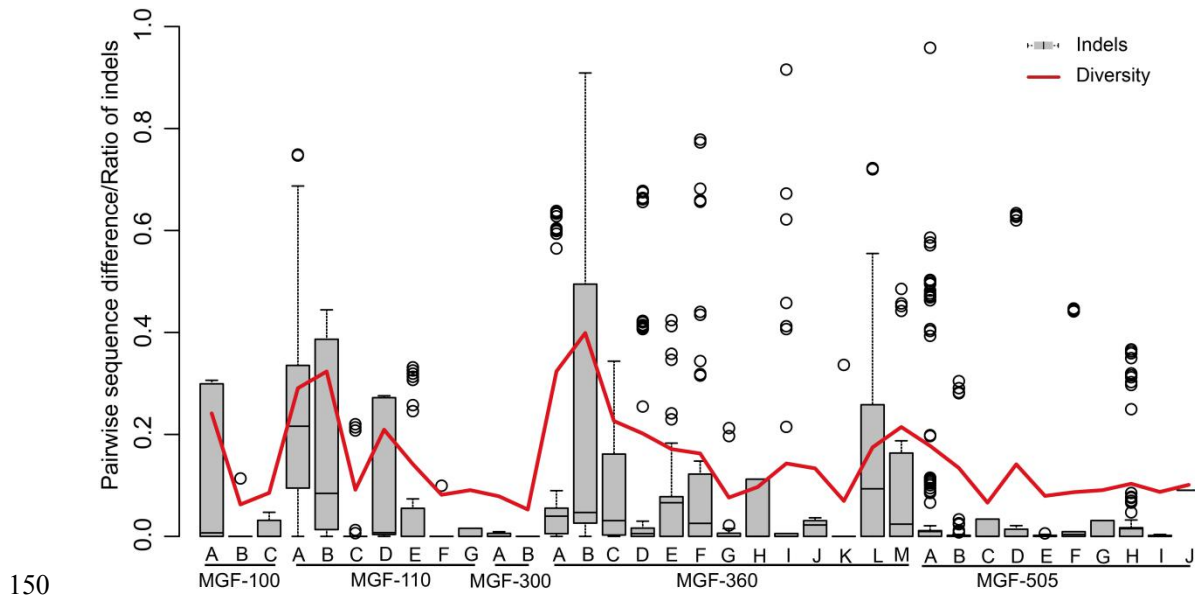

150

151 **Figure 2** The genetic diversity of the MGF groups. The red curve denoted the  
152 diversity index, while the box plot denoted the ratio of indels.

153 The insertions and deletions (indels) in protein sequences of each MGF group were  
154 also investigated. The pairwise ratios of protein sequence difference introduced by  
155 indels were calculated for each MGF group. Interestingly, there was a high positive  
156 correlation between the diversity index and the average ratio of indels, with a  
157 Pearson's correlation coefficient of 0.82, which indicated that the genetic diversity  
158 within the MGF groups was mainly contributed by indels. For example, the largest  
159 diversity index of the MGF-360B was 0.40, and the corresponding ratio of indels was  
160 also large.

### 161 **Structure and function analysis of the MGF groups**

162 We further characterized the structure and function of the MGF proteins for the MGF  
163 groups. Nine MGF groups were predicted to be all-alpha proteins, of which eight  
164 belonged to MGF-505 family. Only two MGF groups, i.e., the MGF-100C and  
165 MGF-300B, were predicted to be alpha-beta proteins. Analysis of structural flexibility  
166 showed that eight MGF groups were locally disordered, including all three MGF  
167 groups in MGF-100 family.

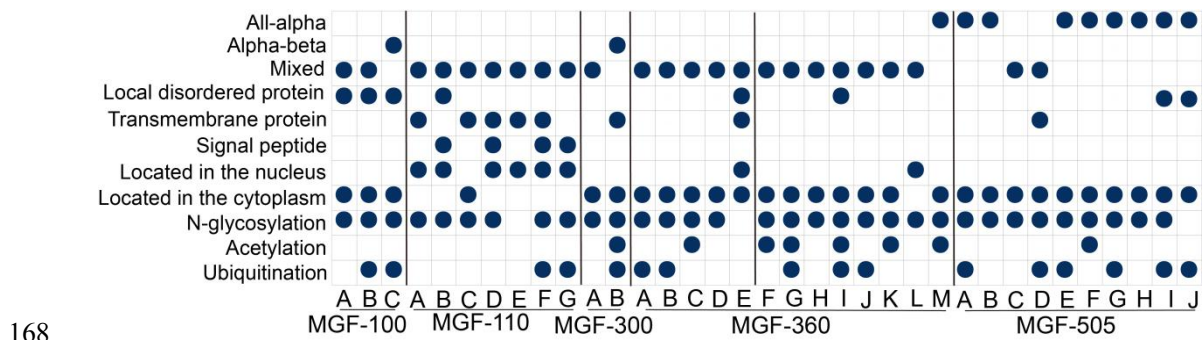

168

169 **Figure 3** Structure and function analysis of MGF proteins for the MGF groups. In this  
 170 study, a local disordered protein was defined as a long disordered region containing  
 171 more than 30 residues (Singh, Ganapathi, & Dash, 2007). In addition, the protein class  
 172 was determined based on Geourjon's study (Geourjon & Deleage, 1995). Specifically,  
 173 a class with an alpha-helix (H) ratio > 45% and a beta-sheet ration (E) < 5% was  
 174 defined as all-alpha, while a class with H < 5% and E > 45% was defined as all-beta.  
 175 The alpha-beta class was with H > 30% and E > 20%, and the rest was defined as  
 176 mixed class.

177

178 Eight MGF groups were predicted to contain one or more transmembrane helixes, five  
 179 of which belonged to the MGF-110 family. Additionally, all the four MGF groups  
 180 predicted to contain the signal peptide, and six of the eight MGF groups predicted to  
 181 be located in the nucleus, also belonged to the MGF-110 family, indicating that most  
 182 MGF groups in the MGF-110 family may be located in both the cell membrane and  
 183 nucleus. Overall, the majority of the MGF groups were predicted to be located in the  
 184 cytoplasm.

185 Post-translational modification of the MGF proteins was analyzed. The N-linked  
 186 glycosylation was predicted to occur in 32 of the 35 MGF groups. The ubiquitination  
 187 was also predicted to occur in half of all the MGF groups, while the acetylation was  
 188 predicted to mainly occur in the MGF groups of the MGF-360 family.

189 **Evolution of MGF proteins**



190 Finally, we investigated the dynamic evolution of the MGF proteins. The number of  
191 the MGF proteins in each MGF group in the ASFVs isolated from 1950 to 2019 was  
192 shown in Figure 4. Interestingly, most MGF groups had only one member in an ASFV  
193 genome, though some MGF groups had multiple members in an ASFV genome, such  
194 as MGF-110A, MGF-360A and MGF-360B. While the number of MGF proteins in an  
195 ASFV genome varied, 17 of the 35 MGF groups were present in all ASFVs,  
196 indicating the important role of these MGF groups in ASFVs. In addition, some MGF  
197 groups presented significant expansion and contraction during the evolution. For  
198 example, the MGF-110A had three to five members in the X and IX genotype strains,  
199 and no more than two members in eight of the nine viral strains of the genotype I.  
200 Moreover, we also found that the viral strain Tengani was lost in the MGF-110A.  
201 While some MGF groups were generated in the evolution of ASFVs, such as  
202 MGF-360L and MGF-360M, some MGF groups were also lost in the evolution of  
203 ASFVs, such as MGF-110G.

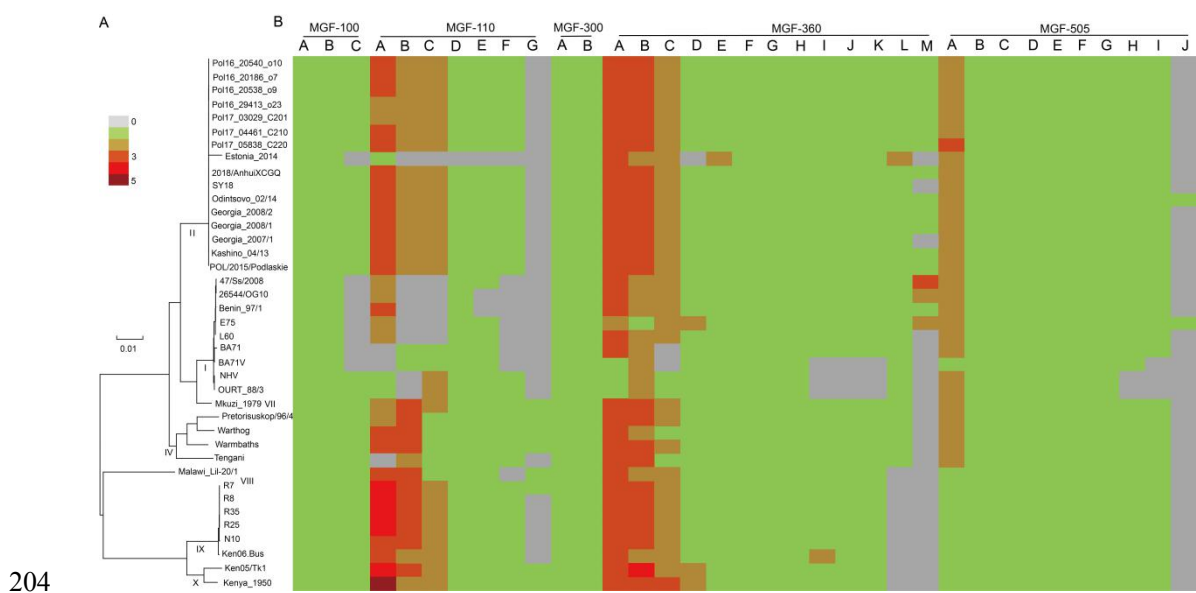

204  
205 **Figure 4.** The evolution of the MGF proteins from 1950 to 2019. (A) The  
206 maximum-likelihood phylogenetic tree of ASFVs based on the genome sequences  
207 adapted from Figure 2A in Zhu's work (Zhu et al., 2019). The genotypes of the  
208 ASFVs were denoted by the bold and italic numbers, while the scale bar represented

209 the number of nucleotide substitutions per site. (B) The number of the MGF proteins  
210 in each MGF group in ASFV genomes.

211

## 212 **DISCUSSION**

213 In this study, we first validated the large genetic diversity of the MGF proteins by  
214 classifying the MGF proteins of ASFVs into 35 groups. Based on the result of MGF  
215 grouping, we systematically analyzed the genetic diversity, structure, function and  
216 evolution of the MGF proteins. Interestingly, a strong positive correlation was found  
217 between the genetic diversity and the level of indels within the MGF groups,  
218 demonstrating that the indels account for the majority of the genetic diversity in MGF  
219 groups. This finding is consistent with our previous study that the genetic diversity of  
220 ASFV genomes was mainly caused by indels instead of mutations (Zhu et al., 2019).

221 The MGF groups were predicted to have large structural and functional diversity in  
222 our study. This may be related to the diverse functions of MGF proteins reported in  
223 previous studies (L. Dixon, Islam, Nash, & Reis, 2019; Netherton et al., 2019). For  
224 example, it is reported that the MGF proteins were associated with the virulence,  
225 antigenicity and immune escape of ASFVs (Burrage, Lu, Neilan, Rock, & Zsak, 2004;  
226 Golding et al., 2016). Our findings suggested that MGF proteins sharing the same  
227 MGF family tend to have similar structures, locations and functions. For example,  
228 most MGF groups in the MGF-110 family were found to have a mixed composition of  
229 secondary structures, transmembrane helices, signal peptides and N-linked  
230 glycosylation, which may imply the same origin of MGF groups within each MGF  
231 family.

232 More than half of MGF groups presented significant expansion and contraction in  
233 ASFV genomes. The dynamic changes in the MGF proteins may cause the phenotypic  
234 changes in ASFVs, such as the changes in antigen and virulence (Chapman et al.,  
235 2008). Many attempts to develop effective vaccines against ASFVs have failed, one  
236 possible reason of which is the complex composition of antigens (O'Donnell et al.,

237 2015; Rock, 2017). Therefore, understanding the function and the mechanisms  
238 underlying the dynamic changes in MGF proteins may facilitate the development of  
239 vaccines and drugs against ASFVs. Taken together, we expect this work would not  
240 only provide a classification for MGF proteins, but also facilitate further research on  
241 MGF proteins.

242

### 243 **Acknowledgements**

244 This work was supported by the National Key Plan for Scientific Research and  
245 Development of China (2016YFD0500300), Hunan Provincial Natural Science  
246 Foundation of China (2018JJ3039), the National Natural Science Foundation of China  
247 (31671371), the Chinese Academy of Medical Sciences (2016-I2M-1-005), and the  
248 Key R&D Program of Sichuan (2018NZ0151).

249 The authors have declared that no competing interests exist.

250

### 251 **Ethical Statement**

252 Not applicable because no human or animal samples were collected in this study.

253

254

### 255 **References**

- 256 Arias, M., Jurado, C., Gallardo, C., Fernández - Pinero, J., & Sánchez - Vizcaíno, J. (2018). Gaps in  
257 African swine fever: Analysis and priorities. *Transboundary and emerging diseases*, *65*,  
258 235-247.
- 259 Armenteros, J. J. A., Tsirigos, K. D., Sønderby, C. K., Petersen, T. N., Winther, O., Brunak, S., . . .  
260 Nielsen, H. (2019). SignalP 5.0 improves signal peptide predictions using deep neural  
261 networks. *Nature biotechnology*, *37*(4), 420.
- 262 Burrage, T., Lu, Z., Neilan, J., Rock, D. L., & Zsak, L. (2004). African swine fever virus multigene  
263 family 360 genes affect virus replication and generalization of infection in *Ornithodoros*  
264 *porcinus* ticks. *Journal of virology*, *78*(5), 2445-2453.
- 265 Chapman, D. A., Tcherepanov, V., Upton, C., & Dixon, L. K. (2008). Comparison of the genome  
266 sequences of non-pathogenic and pathogenic African swine fever virus isolates. *Journal of*  
267 *General Virology*, *89*(2), 397-408.

- 268 Chou, K.-C., & Shen, H.-B. (2010). Cell-PLOC 2.0: An improved package of web-servers for predicting  
269 subcellular localization of proteins in various organisms. *development*, *109*, 1091.
- 270 Costard, S., Mur, L., Lubroth, J., Sanchez-Vizcaino, J., & Pfeiffer, D. U. (2013). Epidemiology of  
271 African swine fever virus. *Virus research*, *173*(1), 191-197.
- 272 Dixon, L., Islam, M., Nash, R., & Reis, A. (2019). African swine fever virus evasion of host defences.  
273 *Virus research*.
- 274 Dixon, L. K., Chapman, D. A., Netherton, C. L., & Upton, C. (2013). African swine fever virus  
275 replication and genomics. *Virus research*, *173*(1), 3-14.
- 276 Emms, D. M., & Kelly, S. (2015). OrthoFinder: solving fundamental biases in whole genome  
277 comparisons dramatically improves orthogroup inference accuracy. *Genome biology*, *16*(1),  
278 157.
- 279 Galindo, I., & Alonso, C. African Swine Fever Virus: A Review. *Viruses*, *9*(5), 103-.
- 280 Ge, S., Li, J., Fan, X., Liu, F., Li, L., Wang, Q., . . . Wang, H. Molecular Characterization of African  
281 Swine Fever Virus, China, 2018. *Emerging infectious diseases*, *24*(11), 2131-2133.
- 282 Geourjon, C., & Deleage, G. (1995). SOPMA: significant improvements in protein secondary structure  
283 prediction by consensus prediction from multiple alignments. *Bioinformatics*, *11*(6), 681-684.
- 284 Golding, J. P., Goatley, L., Goodbourn, S., Dixon, L. K., Taylor, G., & Netherton, C. L. (2016).  
285 Sensitivity of African swine fever virus to type I interferon is linked to genes within multigene  
286 families 360 and 505. *Virology*, *493*, 154-161.
- 287 Gupta, R., Jung, E., & Brunak, S. (2004). Prediction of N-glycosylation sites in human proteins.
- 288 Huson, D. H., Richter, D. C., Rausch, C., DeZulian, T., Franz, M., & Rupp, R. (2007). Dendroscope: An  
289 interactive viewer for large phylogenetic trees. *BMC bioinformatics*, *8*(1), 460.
- 290 Katoh, K., & Standley, D. M. (2013). MAFFT multiple sequence alignment software version 7:  
291 improvements in performance and usability. *Molecular biology and evolution*, *30*(4), 772-780.
- 292 Keßler, C., Forth, J. H., Keil, G. M., Mettenleiter, T. C., Blome, S., & Karger, A. (2018). The  
293 intracellular proteome of African swine fever virus. *Scientific reports*, *8*(1), 14714.
- 294 Kiemer, L., Bendtsen, J. D., & Blom, N. (2004). NetAcet: prediction of N-terminal acetylation sites.  
295 *Bioinformatics*, *21*(7), 1269-1270.
- 296 Kumar, S., Stecher, G., Li, M., Knyaz, C., & Tamura, K. (2018). MEGA X: molecular evolutionary  
297 genetics analysis across computing platforms. *Molecular biology and evolution*, *35*(6),  
298 1547-1549.
- 299 Li, C., Chai, Y., Song, H., Weng, C., Qi, J., Sun, Y., & Gao, G. F. (2019). Crystal Structure of African  
300 Swine Fever Virus dUTPase Reveals a Potential Drug Target. *mBio*, *10*(5), e02483-02419.
- 301 Möller, S., Croning, M. D., & Apweiler, R. (2001). Evaluation of methods for the prediction of  
302 membrane spanning regions. *Bioinformatics*, *17*(7), 646-653.
- 303 Neilan, J., Zsak, L., Lu, Z., Kutish, G., Afonso, C., & Rock, D. L. (2002). Novel swine virulence  
304 determinant in the left variable region of the African swine fever virus genome. *Journal of*  
305 *virology*, *76*(7), 3095-3104.
- 306 Netherton, C. L., Goatley, L. C., Reis, A. L., Portugal, R., Gault, L. E., Nieto, R., . . . Sánchez-Cordón,  
307 P. (2019). Identification and immunogenicity of African swine fever virus antigens. *Frontiers*  
308 *in Immunology*, *10*, 1318.
- 309 O'Donnell, V., Holinka, L. G., Gladue, D. P., Sanford, B., Krug, P. W., Lu, X., . . . Risatti, G. R. (2015).  
310 African swine fever virus Georgia isolate harboring deletions of MGF360 and MGF505 genes

- 311 is attenuated in swine and confers protection against challenge with virulent parental virus.  
312 *Journal of virology*, 89(11), 6048-6056.
- 313 Parker, J., Plowright, W., & Pierce, M. (1969). The epizootiology of African swine fever in Africa.  
314 *Veterinary Record*, 85(24), 668-.
- 315 R Core Team. (2013). R: A language and environment for statistical computing.
- 316 Peng, K., Radivojac, P., Vucetic, S., Dunker, A. K., & Obradovic, Z. (2006). Length-dependent  
317 prediction of protein intrinsic disorder. *BMC bioinformatics*, 7(1), 208.
- 318 Rock, D. L. (2017). Challenges for African swine fever vaccine development—“... perhaps the end of  
319 the beginning.”. *Veterinary microbiology*, 206, 52-58.
- 320 Singh, G. P., Ganapathi, M., & Dash, D. (2007). Role of intrinsic disorder in transient interactions of  
321 hub proteins. *Proteins: Structure, Function, and Bioinformatics*, 66(4), 761-765.
- 322 Teklue, T., Sun, Y., Muhammad, A., Luo, Y., & Qiu, H. J. (2019). Current status and evolving  
323 approaches to African swine fever vaccine development. *Transboundary and emerging*  
324 *diseases*.
- 325 Vydelingum, S., Baylis, S. A., Bristow, C., Smith, G. L., & Dixon, L. K. (1993). Duplicated genes  
326 within the variable right end of the genome of a pathogenic isolate of African swine fever  
327 virus. *Journal of General Virology*, 74(10), 2125-2130.
- 328 Wang, P., Xiao, X., & Chou, K.-C. (2011). NR-2L: a two-level predictor for identifying nuclear  
329 receptor subfamilies based on sequence-derived features. *PloS one*, 6(8), e23505.
- 330 Yozawa, T., Kutish, G., Afonso, C., Lu, Z., & Rock, D. L. (1994). Two novel multigene families, 530  
331 and 300, in the terminal variable regions of African swine fever virus genome. *Virology*,  
332 202(2), 997-1002.
- 333 Zhu, Z., Xiao, C.-T., Fan, Y., Cai, Z., Lu, C., Zhang, G., . . . Peng, Y. (2019). Homologous  
334 recombination shapes the genetic diversity of African swine fever viruses. *Veterinary*  
335 *microbiology*, 236, 108380.
- 336 Zsak, L., Lu, Z., Burrage, T., Neilan, J., Kutish, G., Moore, D., & Rock, D. (2001). African swine fever  
337 virus multigene family 360 and 530 genes are novel macrophage host range determinants.  
338 *Journal of virology*, 75(7), 3066-3076.

339

340

341
